# Supplementary material for: Impact of Immunoscore on the Management of Stage II Colon Cancer Patients: A Physician Survey
Source: MDPI journal article supplement (doi:10.3390/cancers13215467), 2021-10-30
Supplement: s1 [file s1]

# Supplementary Material: Impact of Immunoscore on the Management of Stage II Colon Cancer Patients: A Physician Survey

Anup Kasi, Efrat Dotan, Graham M. Poage, Aurelie Catteau, Dewi Vernerey, Manju George and Afsaneh Barzi

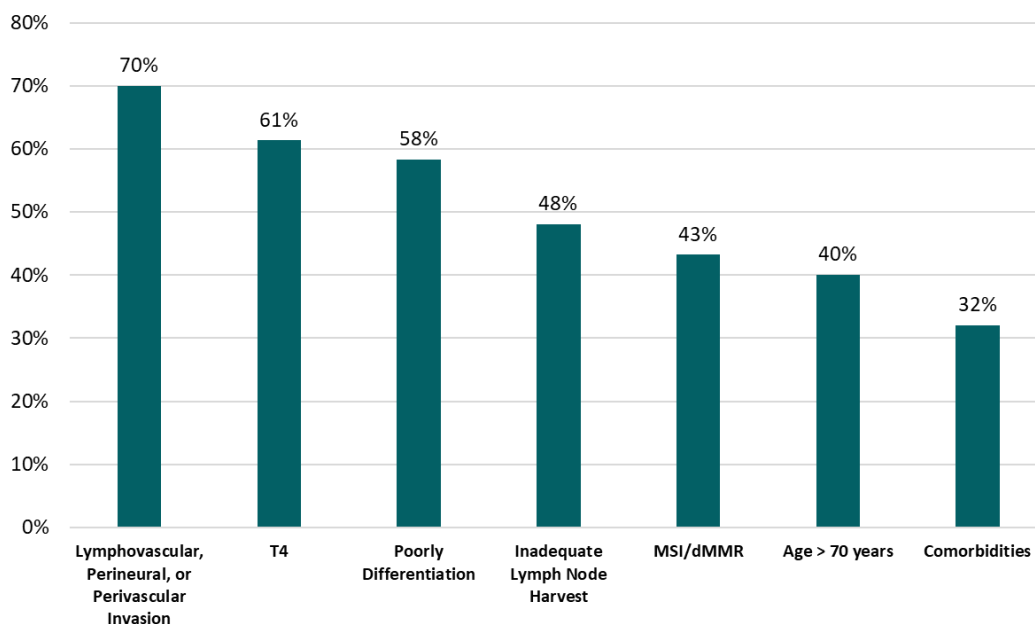

**Figure S1.** Percentage of Participant Recommendations for Adjuvant Chemotherapy by Associated Patient Prognostic Risk Factors (Pre-test).

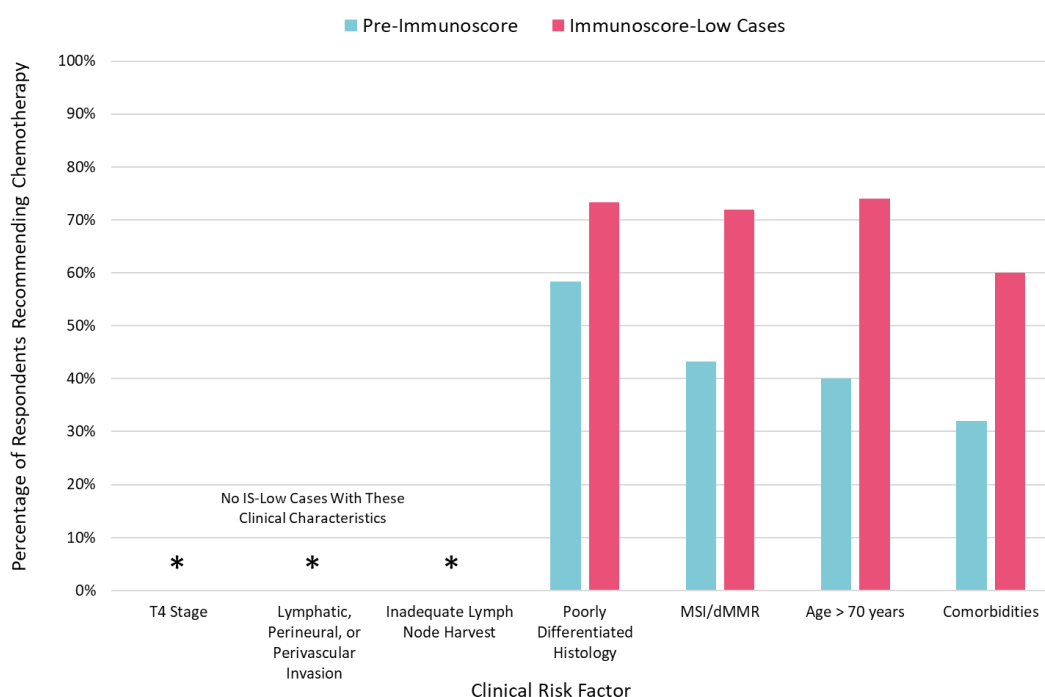

**Figure S2.** Impact of Immunoscore-Low Classification on Adjuvant Chemotherapy Recommendations in Cases with Prognostic Risk Factors. \* No cases were represented with these clinicopathologic features.

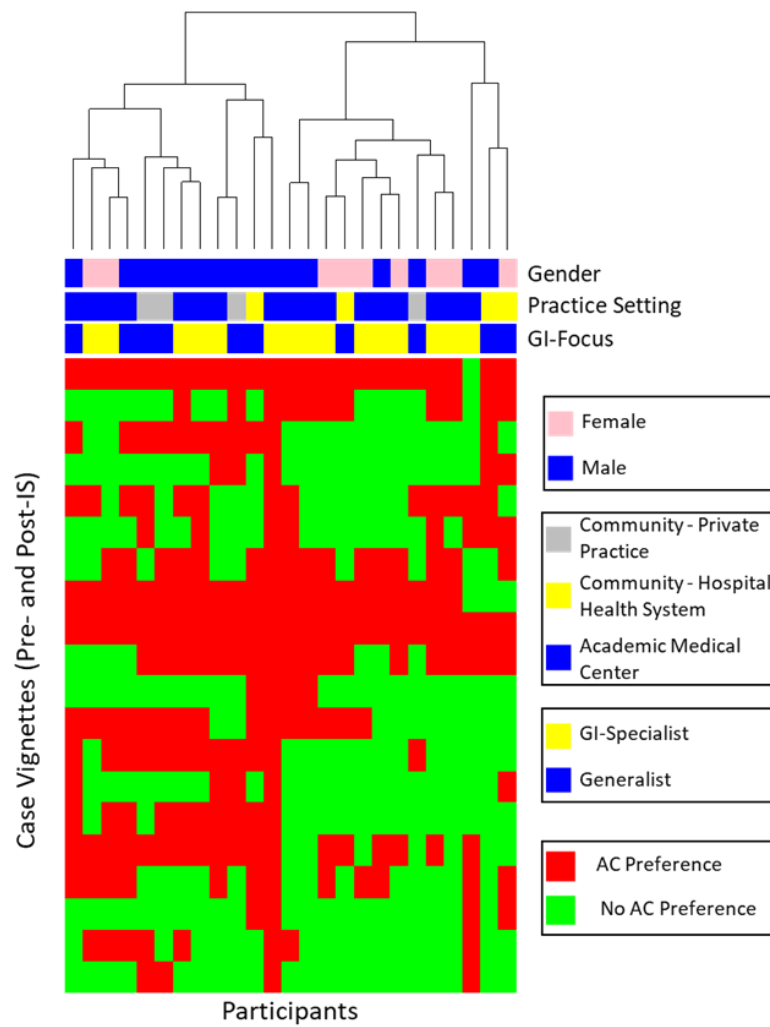

**Figure S3.** Hierarchical Clustering of Participant Recommendations for Adjuvant Chemotherapy and Associated Demographic Factors.

**Table S1.** Patient and Disease Profiles.

| Characteristic                                                | Value        |
|---------------------------------------------------------------|--------------|
| Age                                                           |              |
| Median (range), yr                                            | 63.5 (48-78) |
| >70 yr, <i>n</i> (%)                                          | 4 (40)       |
| Comorbidities, <i>n</i> (%)                                   | 2 (20)       |
| Tumor stage, <i>n</i> (%)                                     |              |
| T3                                                            | 7 (70)       |
| T4                                                            | 3 (30)       |
| Lymphatic, perineural, or perivascular invasion, <i>n</i> (%) | 3 (30)       |
| Inadequate lymph node harvest, <i>n</i> (%)                   | 1 (10)       |
| Bowel obstruction, <i>n</i> (%)                               | 0            |
| Perforation, <i>n</i> (%)                                     | 0            |
| Poorly differentiated histology, <i>n</i> (%)                 | 7 (70)       |
| MSI-H/dMMR, <i>n</i> (%)                                      | 5 (50)       |
| Immunoscore, <i>n</i> (%)                                     |              |
| Low                                                           | 3 (30)       |
| High                                                          | 7 (70)       |

MSI/dMMR, microsatellite instability/deficient mismatch repair.

**Table S2.** Changes in Medical Oncologist Recommendations Regarding Adjuvant Chemotherapy and Surveillance Intensity Post-Immunoscore by Oncologist and Case.

| Partici-<br>pant     | Case 1<br>(IS-High) | Case 2<br>(IS-High) | Case 3<br>(IS-High) | Case 4<br>(IS-Low) | Case 5<br>(IS-High) | Case 6<br>(IS-Low) | Case 7<br>(IS-High) | Case 8<br>(IS-Low) | Case 9<br>(IS-High) | Case 10<br>(IS-High) | Any<br>Case |
|----------------------|---------------------|---------------------|---------------------|--------------------|---------------------|--------------------|---------------------|--------------------|---------------------|----------------------|-------------|
| 1                    | AC                  | AC                  | --                  | --                 | --                  | AC                 | AC                  | --                 | --                  | --                   | Yes         |
| 2                    | AC, S               | --                  | --                  | S                  | AC, S               | AC                 | AC                  | S                  | AC, S               | AC                   | Yes         |
| 3                    | S                   | --                  | --                  | S                  | --                  | S                  | --                  | AC, S              | --                  | --                   | Yes         |
| 4                    | AC, S               | AC, S               | AC, S               | AC, S              | AC, S               | AC, S              | S                   | S                  | AC, S               | S                    | Yes         |
| 5                    | AC                  | --                  | AC, S               | AC                 | AC                  | S                  | AC, S               | S                  | --                  | S                    | Yes         |
| 6                    | AC, S               | AC, S               | S                   | --                 | S                   | AC, S              | AC, S               | --                 | S                   | AC, S                | Yes         |
| 7                    | --                  | S                   | AC                  | S                  | S                   | S                  | --                  | S                  | --                  | S                    | Yes         |
| 8                    | AC                  | AC                  | --                  | AC                 | --                  | AC, S              | AC                  | AC                 | --                  | --                   | Yes         |
| 9                    | --                  | --                  | --                  | --                 | --                  | --                 | --                  | --                 | --                  | --                   | No          |
| 10                   | --                  | --                  | --                  | AC                 | --                  | AC                 | --                  | AC                 | --                  | --                   | Yes         |
| 11                   | AC                  | --                  | --                  | S                  | --                  | S                  | --                  | AC, S              | --                  | S                    | Yes         |
| 12                   | AC, S               | S                   | AC, S               | AC, S              | AC                  | AC, S              | S                   | AC, S              | AC, S               | AC, S                | Yes         |
| 13                   | --                  | --                  | --                  | --                 | --                  | S                  | --                  | AC                 | S                   | --                   | Yes         |
| 14                   | AC, S               | --                  | S                   | --                 | AC, S               | --                 | --                  | AC, S              | AC, S               | S                    | Yes         |
| 15                   | --                  | AC                  | AC                  | --                 | --                  | AC                 | AC                  | --                 | --                  | AC                   | Yes         |
| 16                   | --                  | --                  | --                  | --                 | --                  | S                  | --                  | S                  | --                  | --                   | Yes         |
| 17                   | AC, S               | AC, S               | --                  | S                  | --                  | S                  | AC                  | --                 | --                  | --                   | Yes         |
| 18                   | S                   | S                   | S                   | --                 | S                   | --                 | --                  | --                 | --                  | AC                   | Yes         |
| 19                   | --                  | AC                  | AC                  | AC                 | --                  | S                  | AC                  | --                 | --                  | S                    | Yes         |
| 20                   | S                   | S                   | S                   | --                 | S                   | AC                 | S                   | AC                 | AC, S               | S                    | Yes         |
| 21                   | S                   | S                   | S                   | --                 | S                   | AC                 | S                   | AC                 | --                  | --                   | Yes         |
| 22                   | --                  | --                  | --                  | AC                 | --                  | --                 | --                  | --                 | --                  | --                   | Yes         |
| 23                   | AC, S               | AC, S               | AC, S               | --                 | AC, S               | AC, S              | AC                  | --                 | AC, S               | AC, S                | Yes         |
| 24                   | S                   | --                  | S                   | --                 | S                   | S                  | S                   | --                 | --                  | S                    | Yes         |
| 25                   | AC                  | --                  | --                  | --                 | AC                  | AC                 | --                  | --                 | AC                  | --                   | Yes         |
| Any Par-<br>ticipant | Yes                 | Yes                 | Yes                 | Yes                | Yes                 | Yes                | Yes                 | Yes                | Yes                 | Yes                  |             |

AC, change in recommendation for adjuvant chemotherapy; S, change in recommendation for surveillance. --, no change in clinical recommendations
